# Supplementary material
Source: Elsevier journal article supplement (https://rcastoragev2.blob.core.windows.net/8f6bc7c7542a44c50a3daed7a0aaad0a/mmc1.pdf)
Supplement: mmc1 [file mmc1.pdf]

**Supplemental information**

**A single-cell and spatial wheat root atlas**

**with cross-species annotations delineates**

**conserved tissue-specific marker genes and regulators**

**Yuji Ke, Vincent Pujol, Jasper Staut, Lotte Pollaris, Ruth Seurinck, Thomas Eekhout, Carolin Grones, Maite Saura-Sanchez, Michiel Van Bel, Marnik Vuylsteke, Andrea Ariani, Christophe Liseron-Monfils, Klaas Vandepoele, Yvan Saeys, and Bert De Rybel**

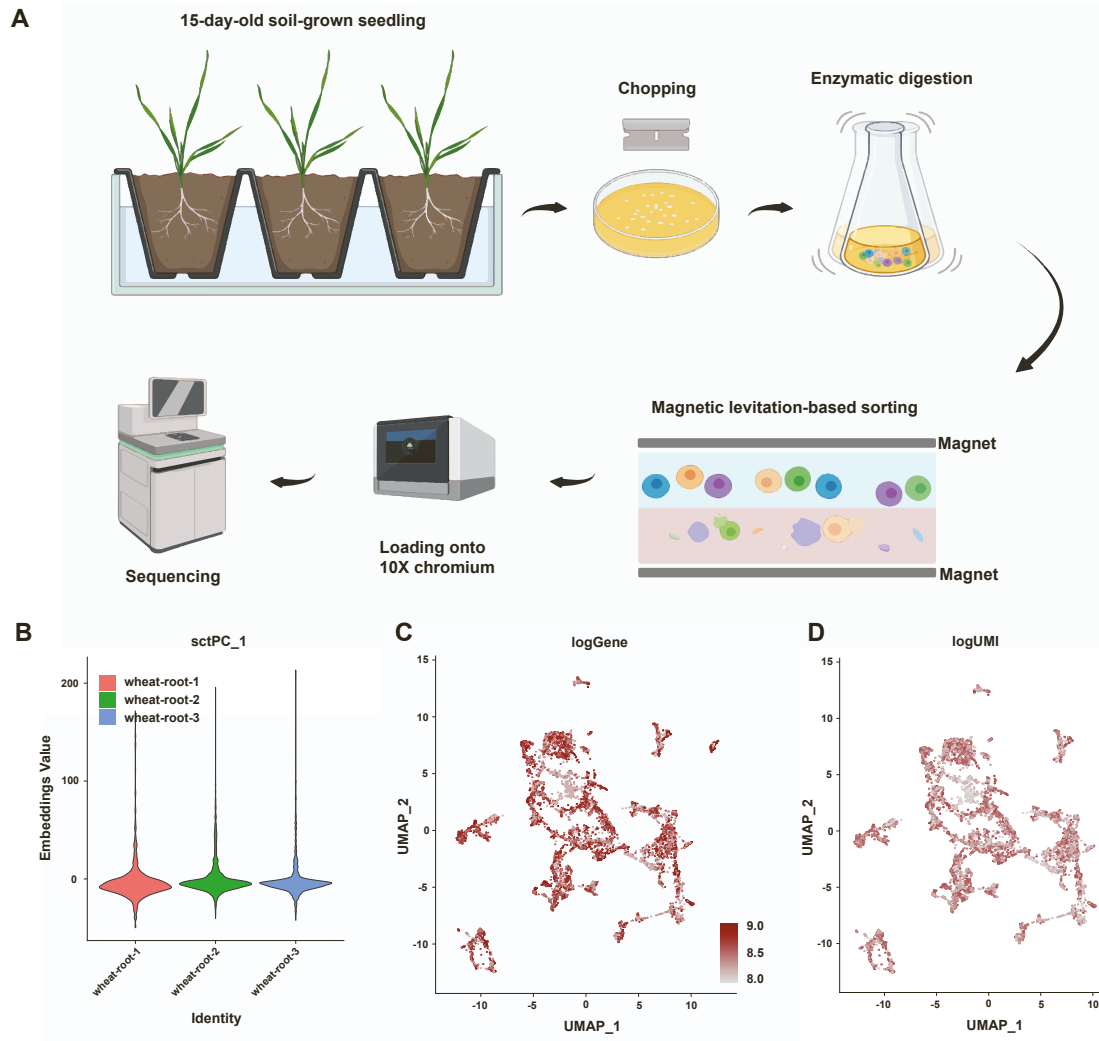

**Figure S1. Experimental workflow and quality control of the wheat root apical meristem single-cell RNA-seq.** (A) Overview of wheat scRNA-seq experimental workflow. Protoplasts were isolated from 5-mm root tips of 15-day soil-grown Chinese Spring wheat, cleaned using a magnetic sorter, loaded onto the 10x Genomics platform followed by high-throughput sequencing. (B) Violin plot showing the distribution of gene expression values for a specific principal component (sctPC\_1) across three replicates. (C) Integrated UMAP showing Gene content distribution across cells. (D) Integrated UMAP showing UMI content distribution across cells.

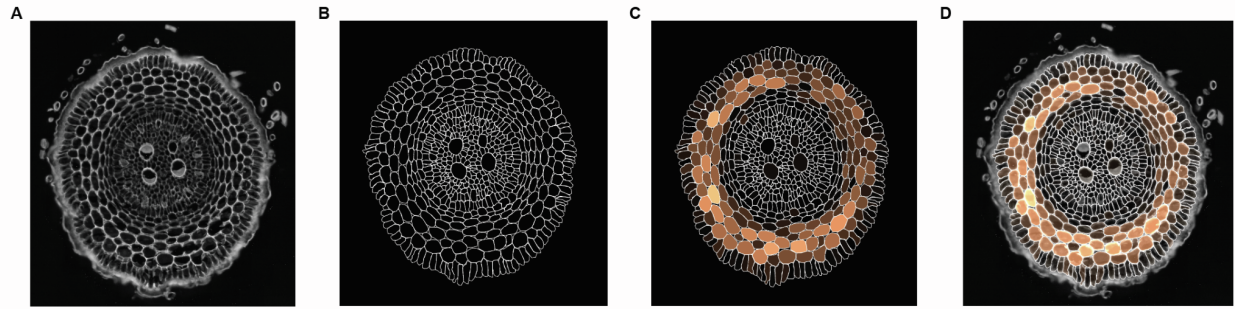

**Figure S2. Stereo-Seq image processing.** (A) Raw image of a root cross section stained with FB. (B) Manual segmentation of the root cross section. (C) Expression pattern of a cortex marker on segmented cells. (D) Overlay of expression pattern of a cortex marker, segmented cells, and raw image of the root section.

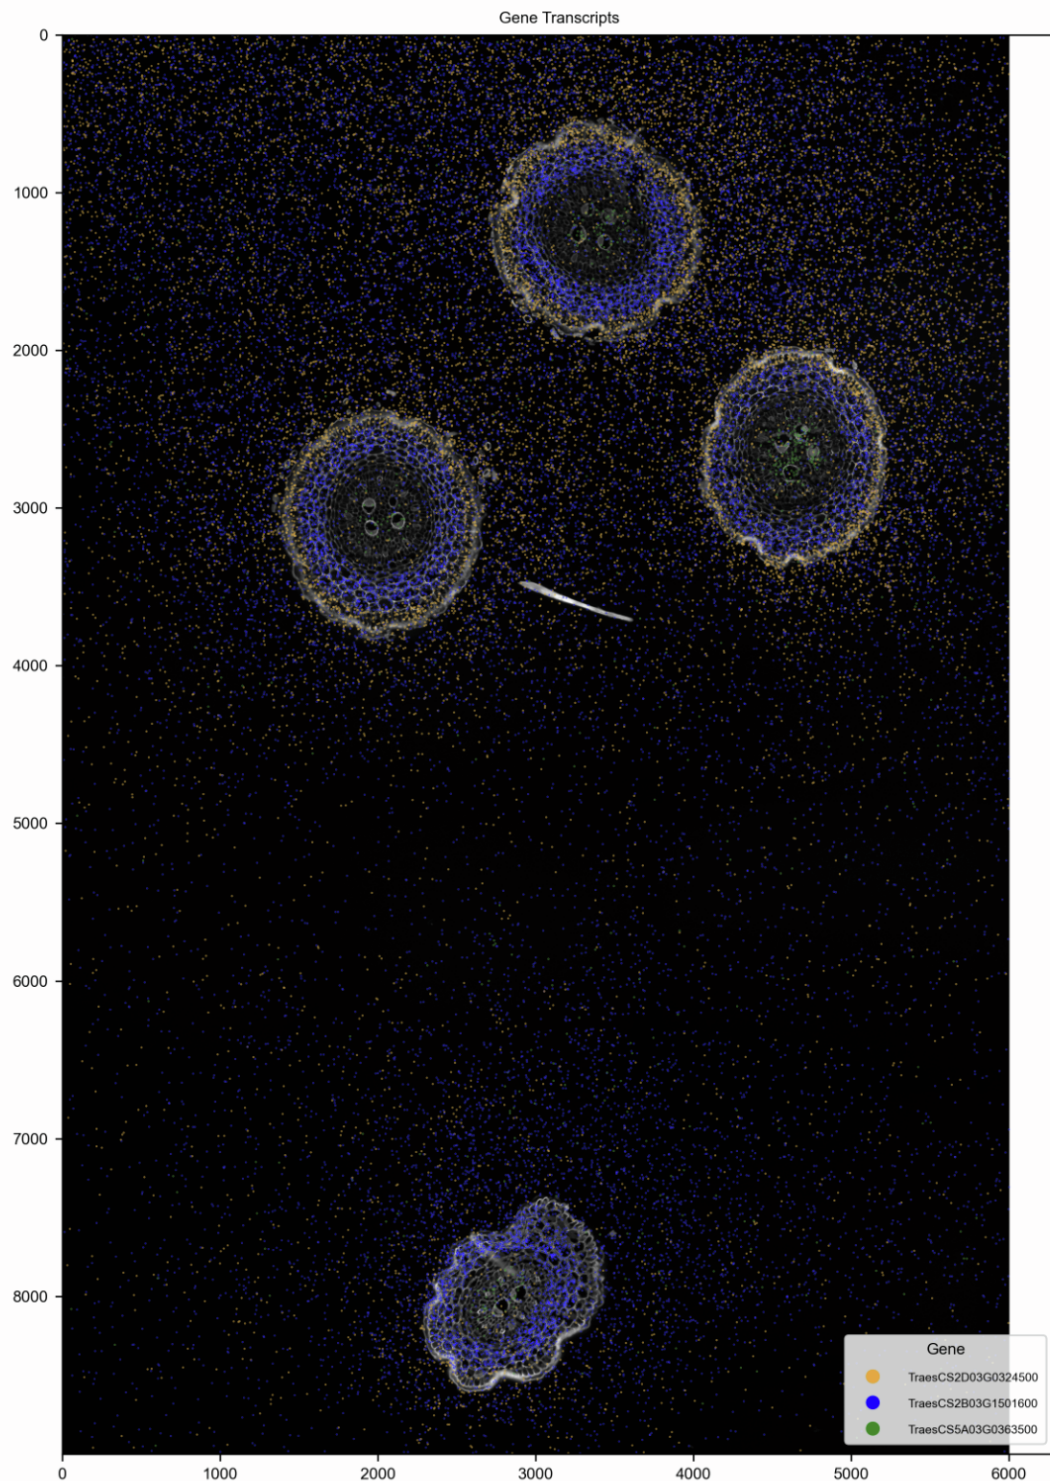

**Figure S3.** Expression pattern of an epidermis, cortex, and provascular cells marker gene on unsegmented Stereo-seq section image. Dots outside the tissue section indicate transcript diffusion.

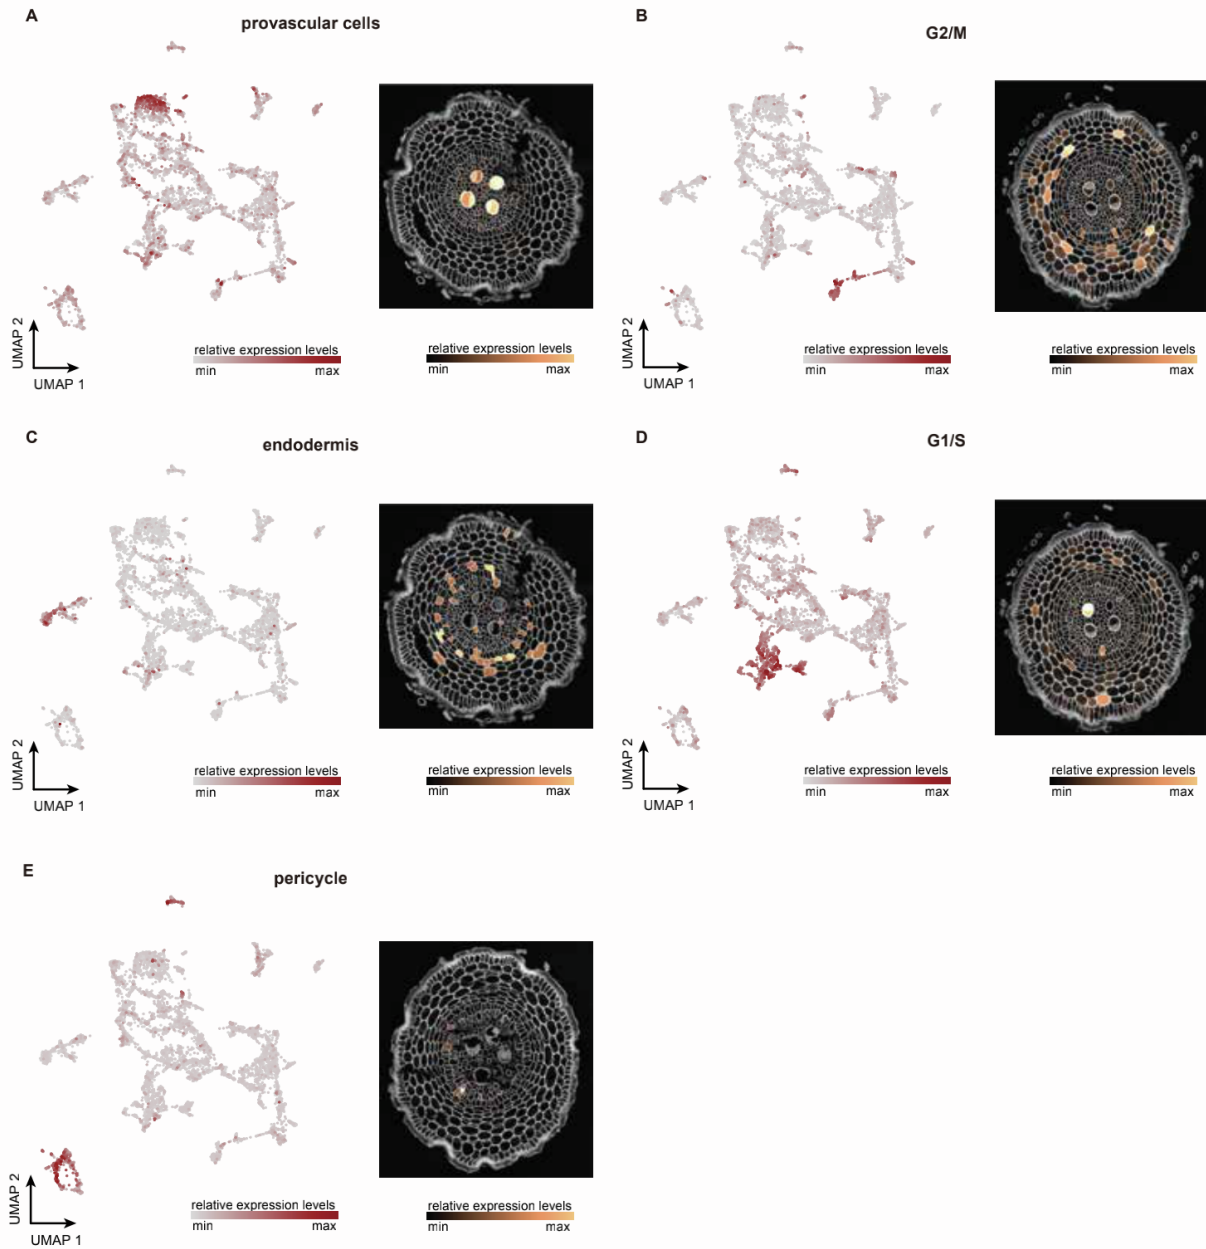

**Figure S4. scRNA-seq derived marker gene expression patterns in Stereo-seq root sections.** (A-D) UMAP feature plot and Stereo-seq visualization of marker genes from provascular cells (A), G2/M (B), endodermis (C), G1/S (D), pericycle (E).

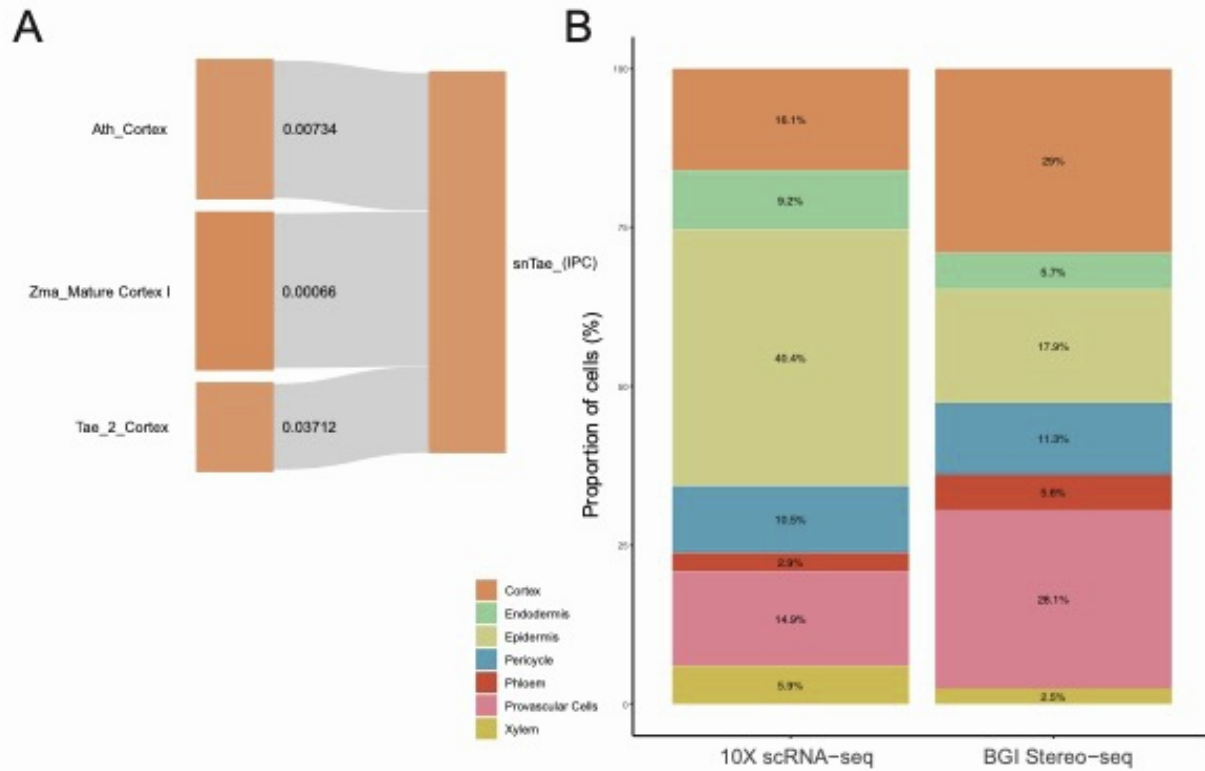

**Figure S5. Resolved cell type annotation and cell type composition of single cell (10X genomics) and spatial transcriptomics (STOmics Stereo-seq) dataset. (A)** Sankey plot showing resolved annotations transferred from Arabidopsis (*Ath*), maize (*Zma*), wheat (*Tae*) to snTae\_Immature Pericycle Cells (IPC) and corresponding q-value. **(B)** Proportion of major cell types in the scRNA-seq and spatial transcriptomics dataset for comparison.



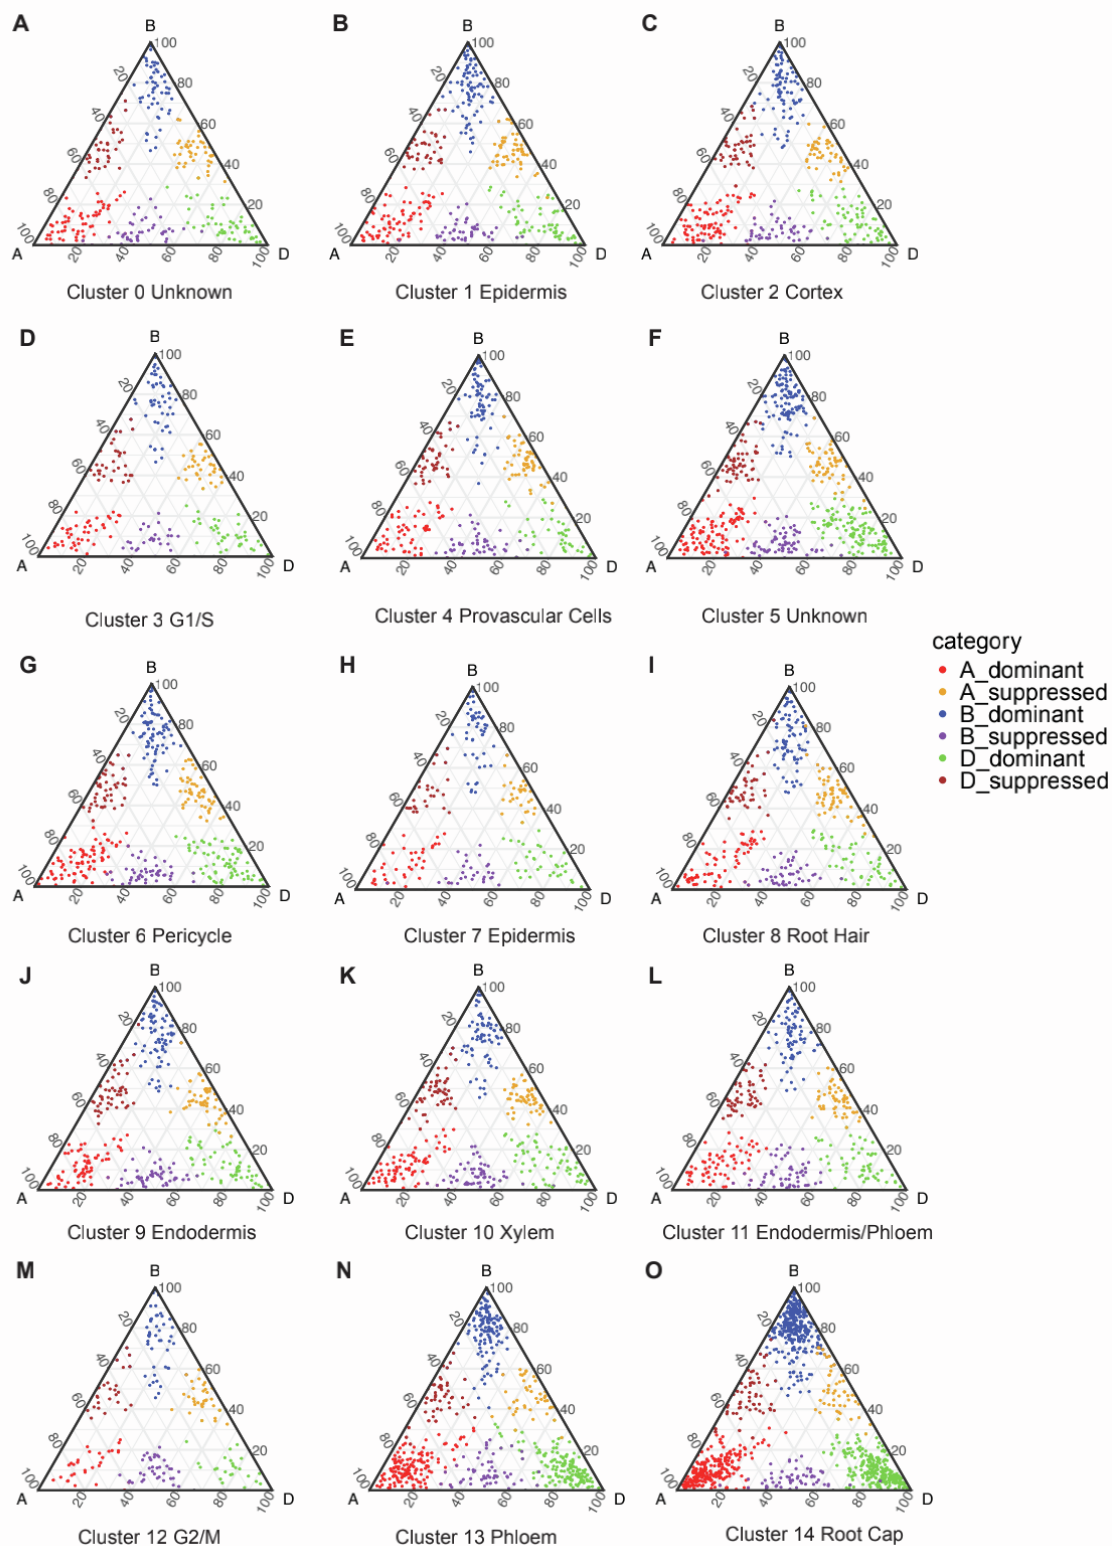

**Figure S6. Ternary plots showing genome asymmetry distribution across all clusters.**

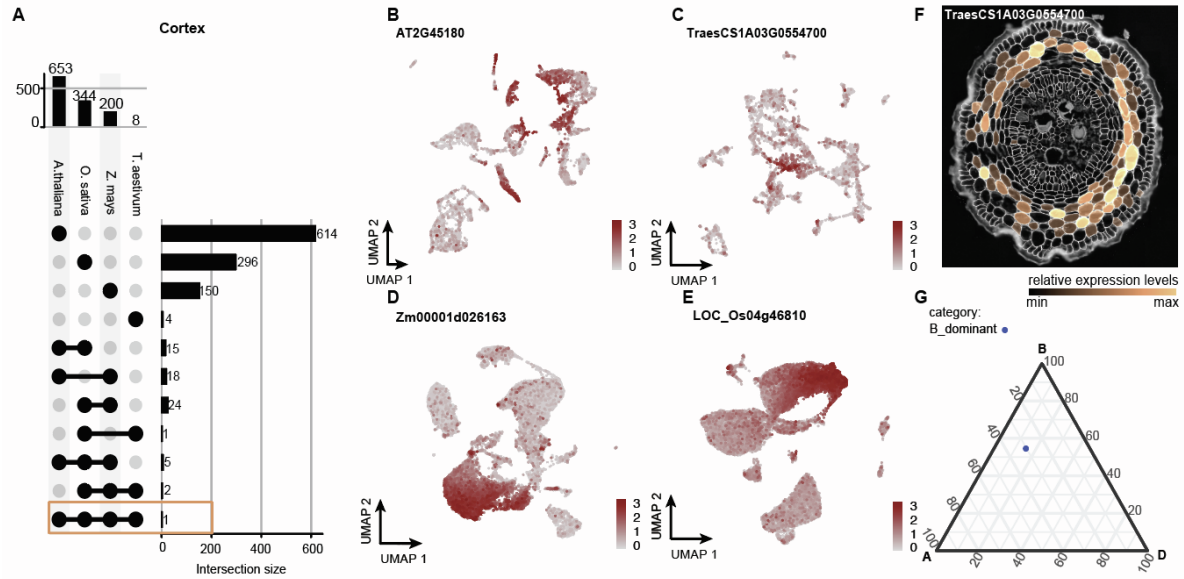

**Figure S7. Tissue-specific markers conserved across Arabidopsis, wheat, rice, and maize.** (A) UpSet plot showing the intersections of cortex markers across Arabidopsis, wheat, rice, and maize. (B-E) Feature plots of a cortex specific marker across species. (F-G) Spatial expression in Stereo-seq data (F) and ternary plot showing genome asymmetry information (G) of the same cortex specific marker in the wheat root meristem.



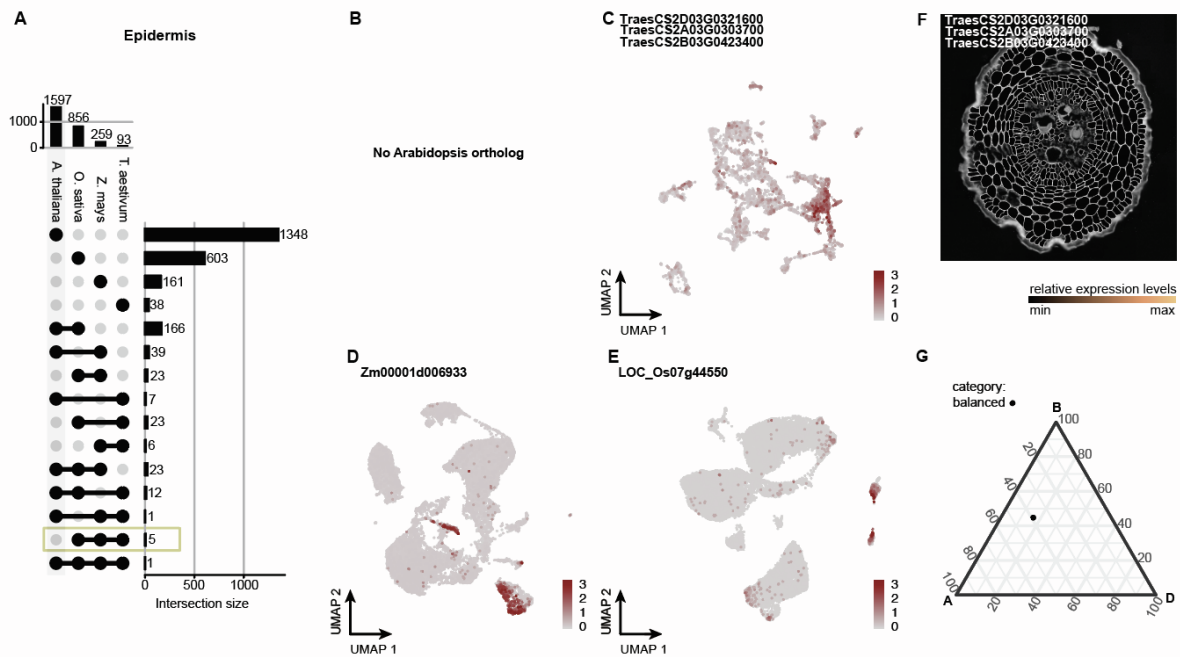

**Figure S8. Tissue-specific markers unique to monocot clade (wheat, rice, and maize).** (A) UpSet plot showing the intersections of epidermis markers across Arabidopsis, wheat, rice, and maize. (B-E) Feature plots of an epidermis specific marker across species. (F-G) Spatial expression in Stereo-seq data (F) and ternary plot showing genome asymmetry information (G) of the same epidermis specific marker in the wheat root meristem.



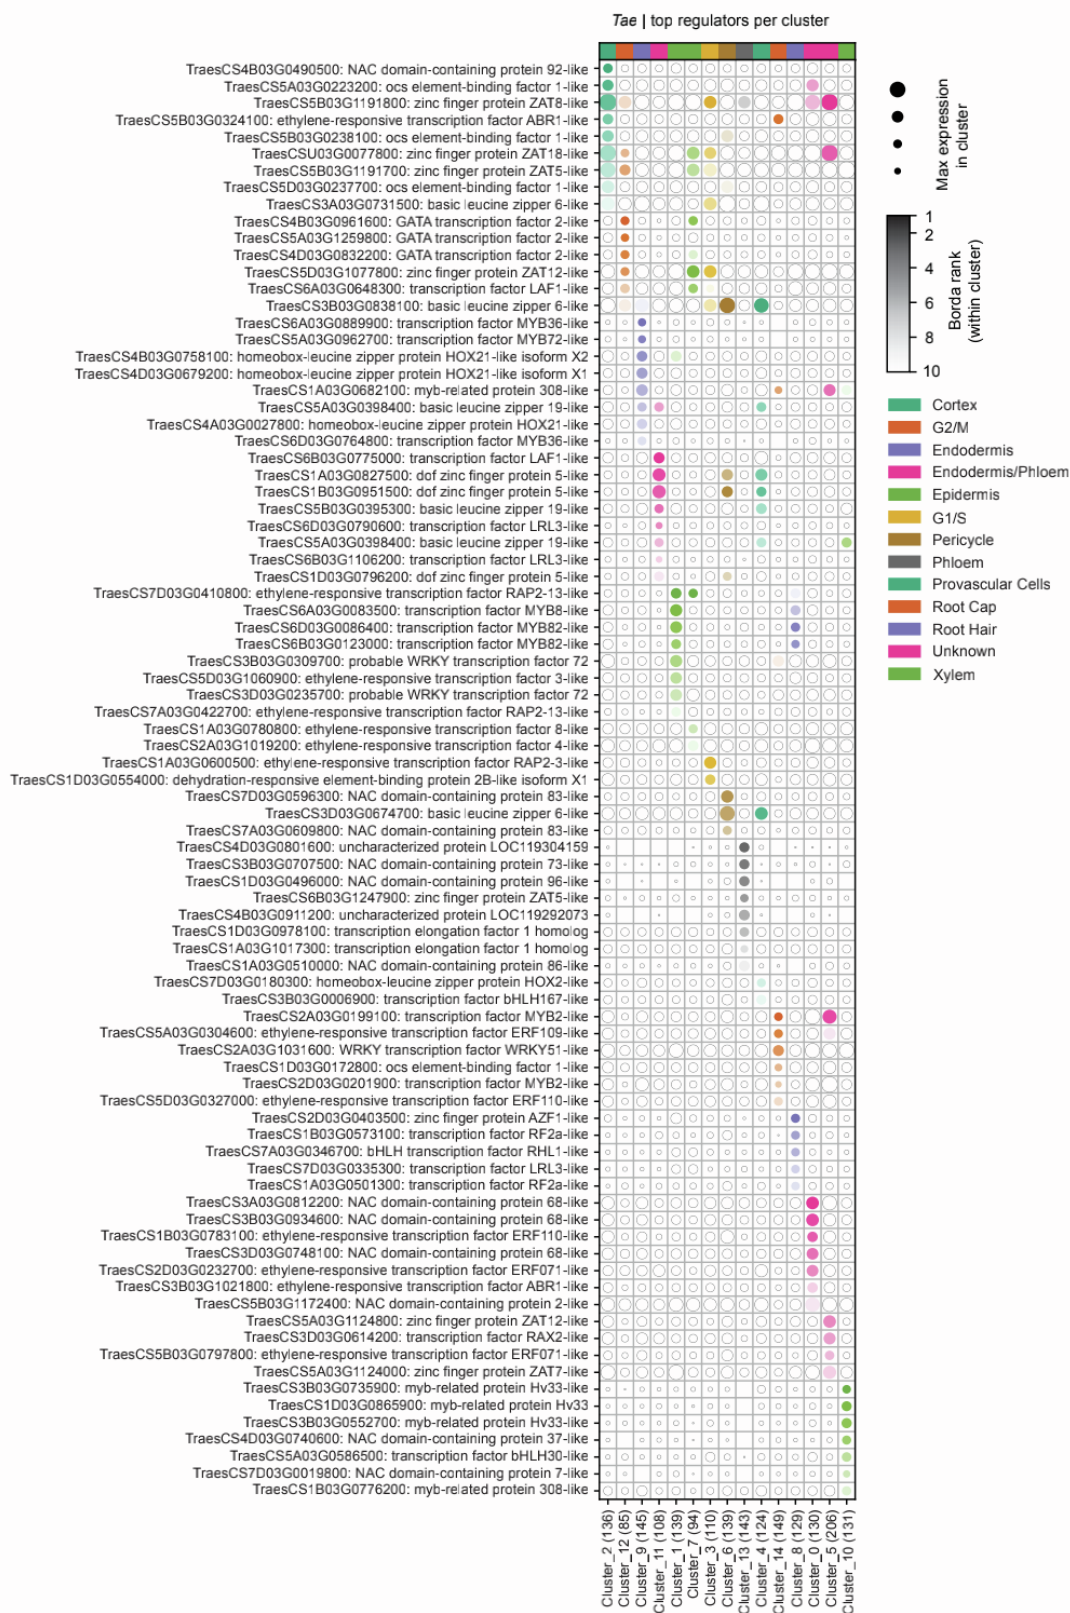

**Figure S10. Top regulons for each cluster for wheat (*Tae*).**

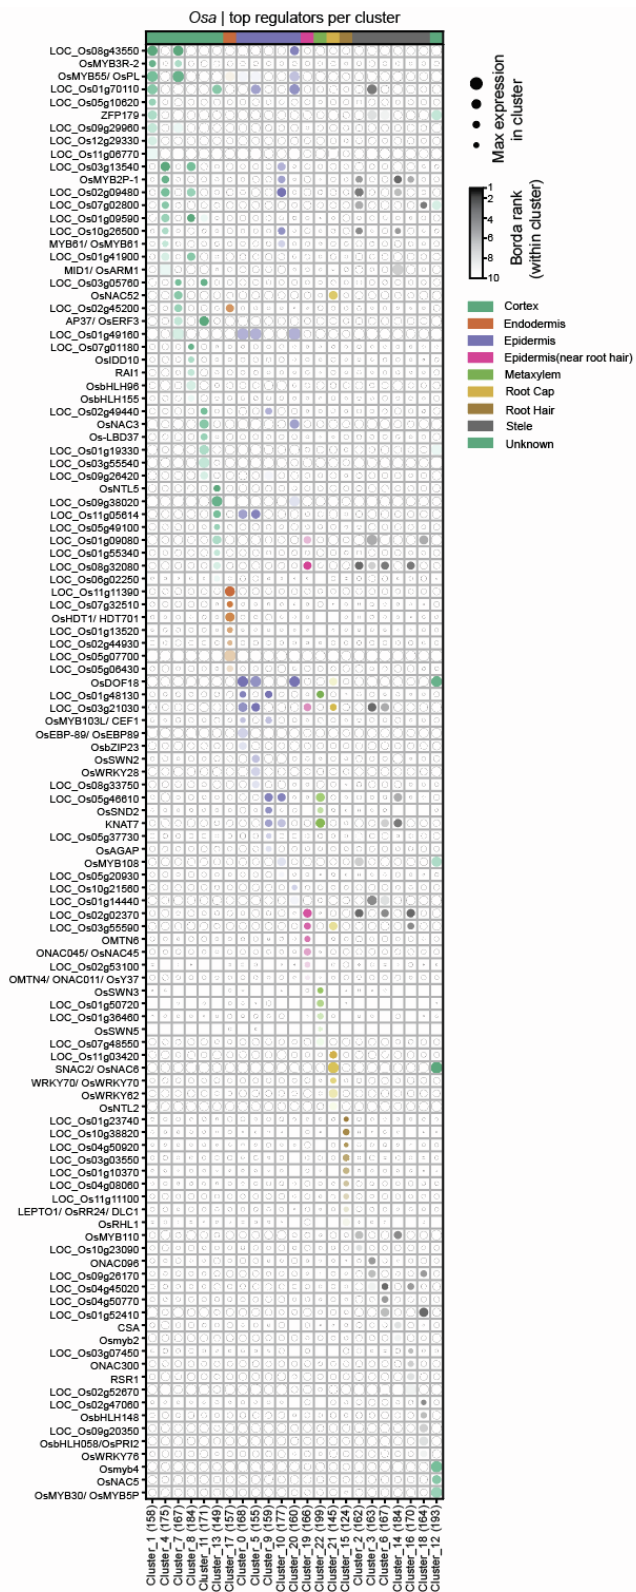

Figure S11. Top regulons for each cluster for rice (*Osa*).

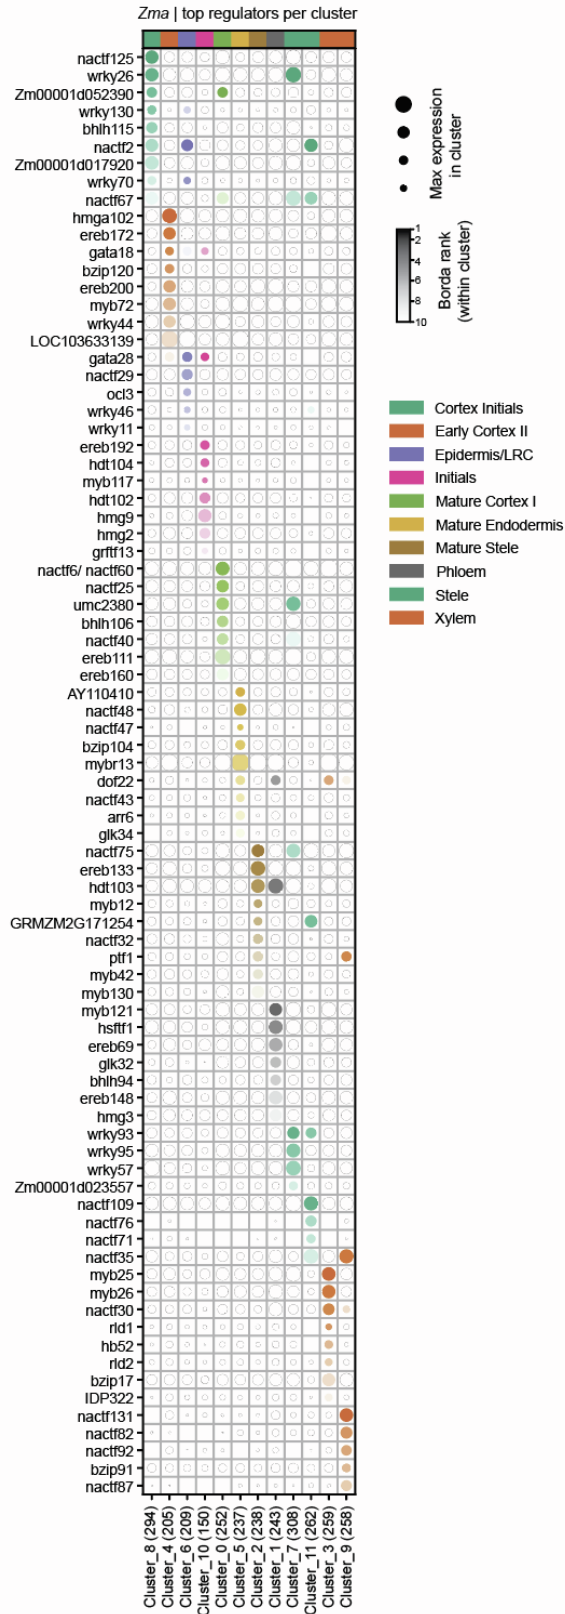

**Figure S12. Top regulons for each cluster for maize (*Zma*).**



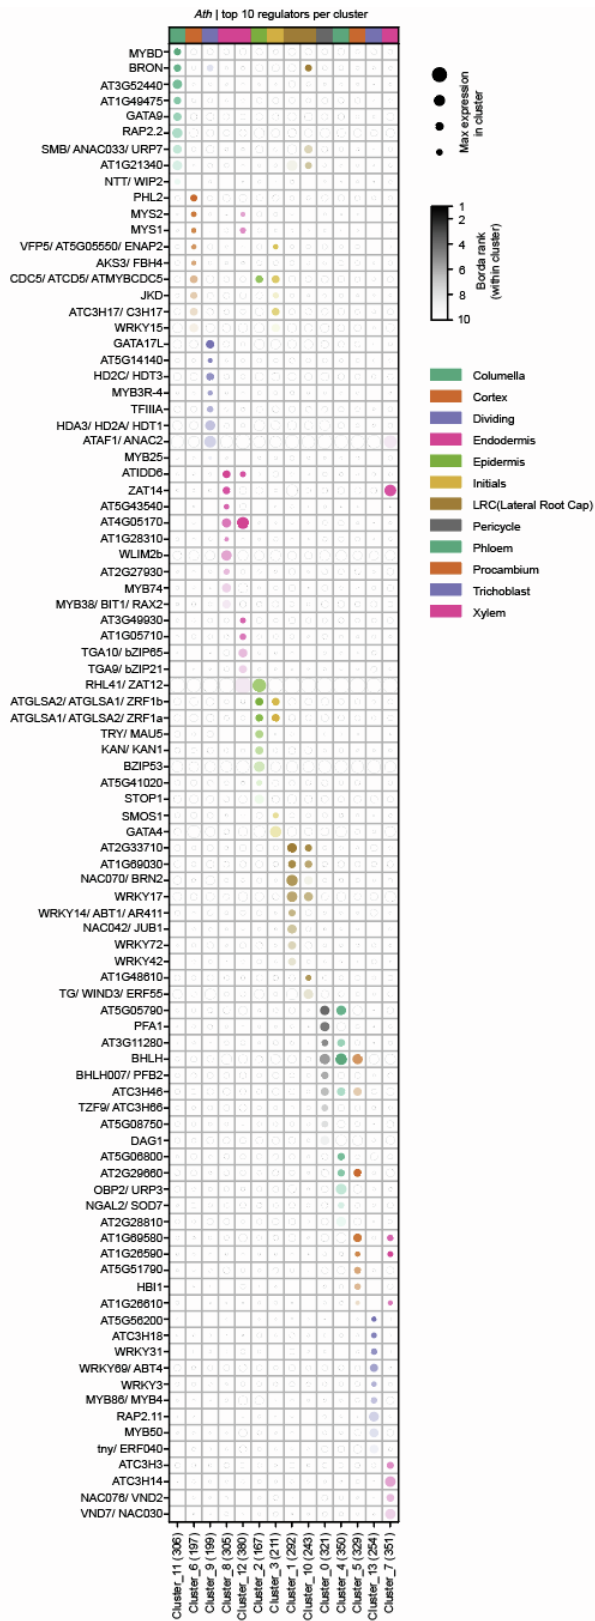

Figure S13. Top regulons for each cluster for Arabidopsis (*Ath*).
